# Supplementary material for: A high-efficiency salamo-based copper(ii) complex double-channel fluorescent probe
Source: Royal Society of Chemistry journal article supplement (doi:10.1039/c9ra09017g), 2019-01-01
Supplement: c9ra09017g1.pdf [file c9ra09017g1.pdf]

## **A high-efficiency Salamo-based copper(II) complex double-channel fluorescent probe**

Zhi-Li Wei, Lan Wang, Shuang-Zhu Guo, Yang Zhang, Wen-Kui Dong\*<sup>□</sup>

*School of Chemical and Biological Engineering, Lanzhou Jiaotong University,  
Lanzhou, Gansu 730070, China*

### *2.1. Materials and Measurements*

All the reagents used are analytical pure (A.R.) and can be used without further purification. The water used is deionized water; the salts used are NaCl, NH<sub>4</sub>ClO<sub>4</sub>, NaCN, Na<sub>2</sub>CO<sub>3</sub>, K<sub>2</sub>HPO<sub>4</sub>, NaHCO<sub>3</sub>, NaHPO<sub>4</sub>, NaHS, KI, NaNO<sub>2</sub>, NaNO<sub>3</sub>, CH<sub>3</sub>COONa, Na<sub>4</sub>P<sub>2</sub>O<sub>7</sub> · 10H<sub>2</sub>O, Na<sub>2</sub>SiO<sub>3</sub>, NaBr and Na<sub>2</sub>S. Elemental analyses were obtained using a GmbH VarioEL V3.00 automatic elemental analysis instrument. Melting points were obtained by use of a microscopic melting point apparatus made in Beijing Taike Instrument Limited Company and were uncorrected. The fluorescence spectra were measured by F-7000 fluorescence spectrometer. <sup>1</sup>H NMR spectra were determined by German Bruker AVANCE DRX-400 spectrometer. UV-vis absorption spectra were recorded on the Shimadzu UV-2550 spectrometer and fluorescence spectra were recorded on the Hitachi F-7000 spectrometers. All pH measurements were made with a pH-10C digital pH meter. ESI-MS spectra were measured on the Bruker Daltonics Esquire 6000 mass spectrometer.

---

\*Corresponding author.

E-mail addresses: [dongwk@126.com](mailto:dongwk@126.com) (W.-K. Dong).

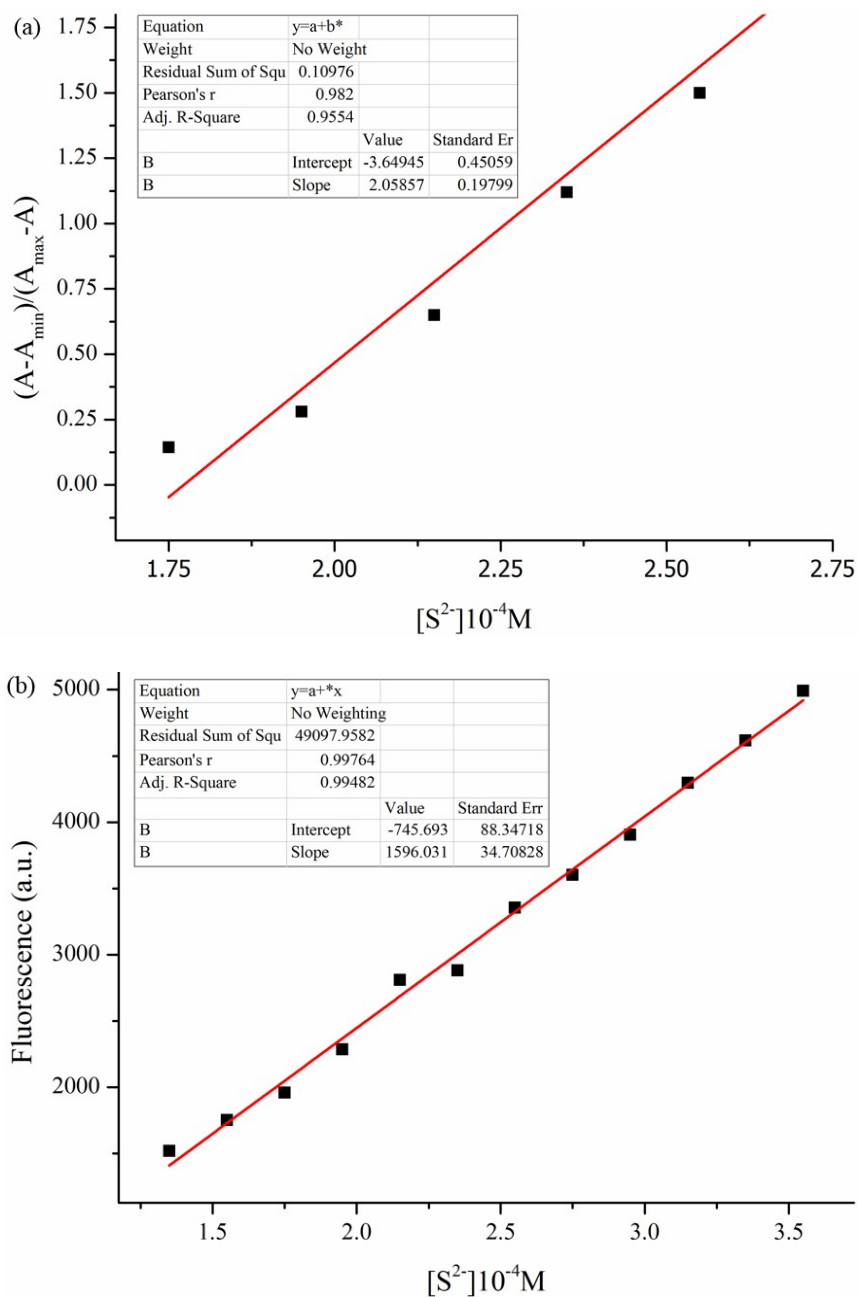

**Figure S1.** (a) Benesi-Hilderbrand plot for sensor **L-Cu<sup>2+</sup>** to determine the association constant for **S<sup>2-</sup>** in ethanol solvent. (b) Linear fit between the fluorescence intensity of L-Cu and the addition of **S<sup>2-</sup>**.

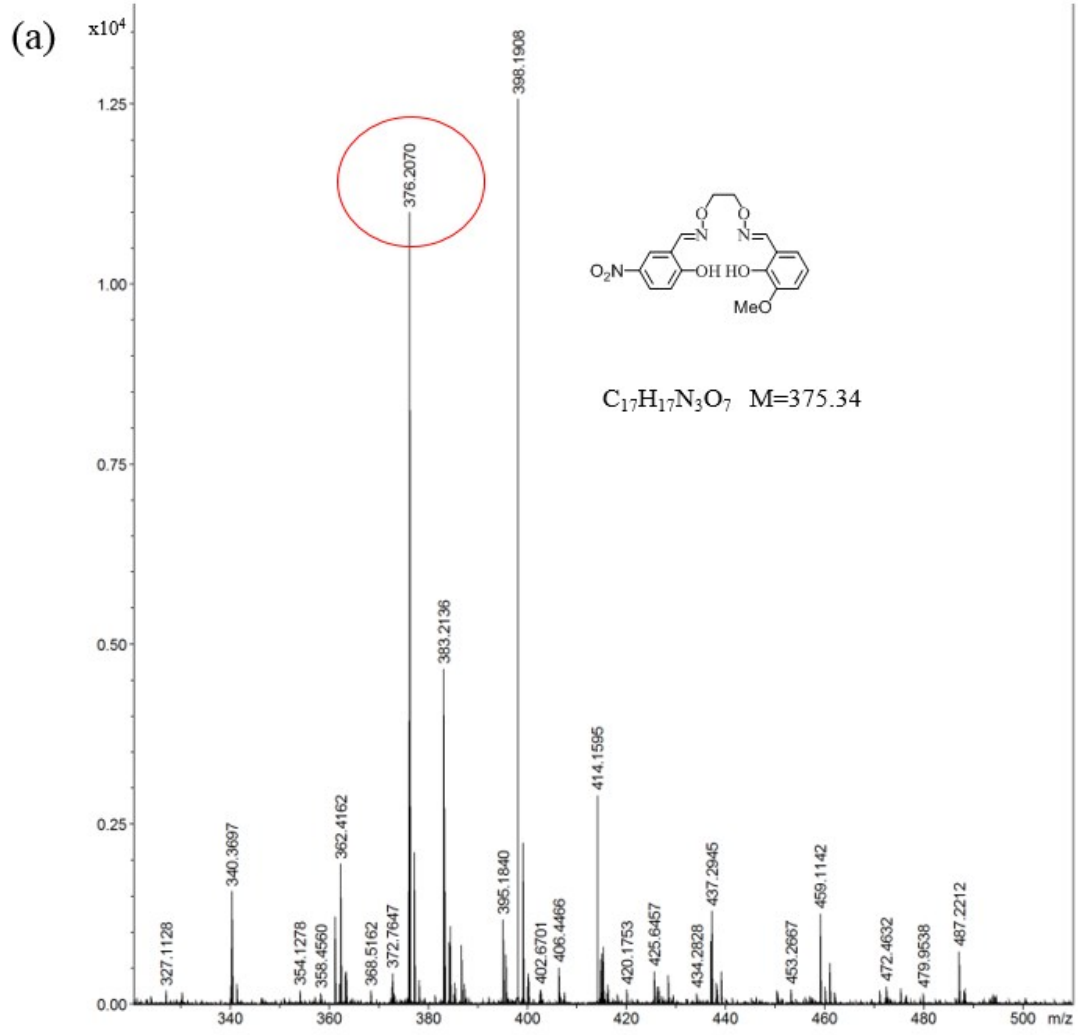

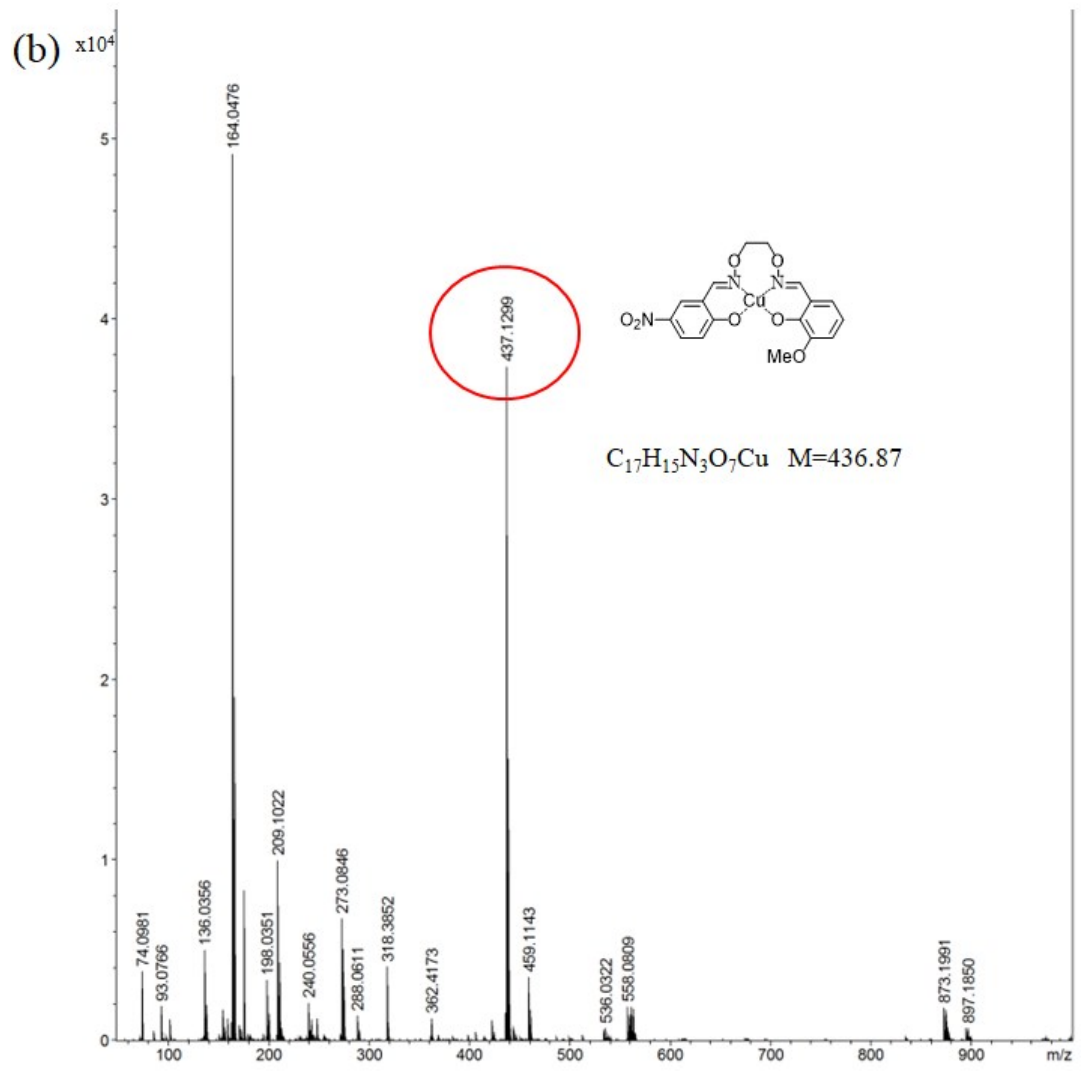

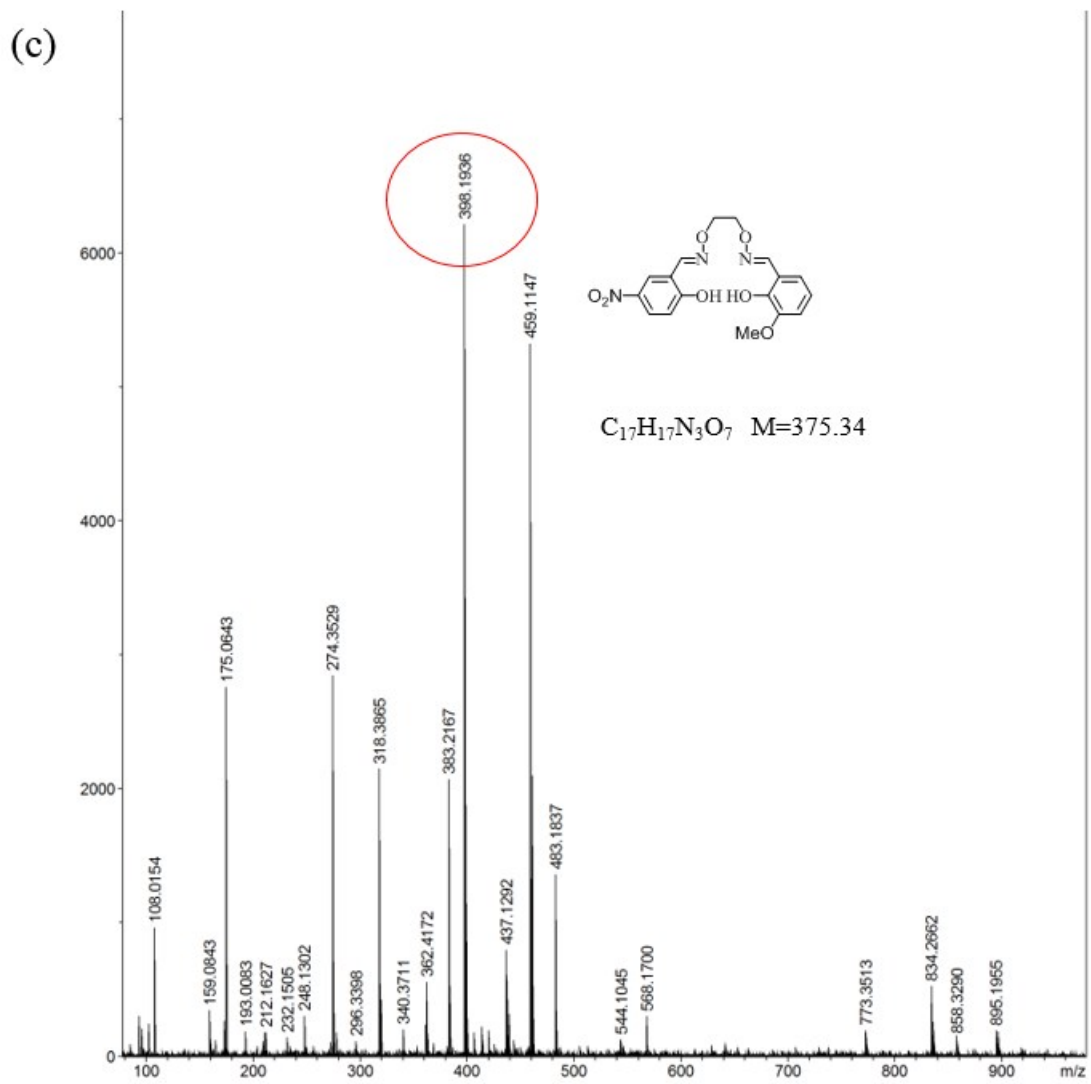

Figure S2. ESI-MS of sensor L-Cu<sup>2+</sup>.
